# Supplementary material
Source: Research Square preprint supplement (doi:10.21203/rs.3.rs-9549966/v1)

# **Highlights**

LIPSS creates a periodic interface that simultaneously regulates substrate, nanocrystalline nucleation, and coating growth.

Ultrafast laser irradiation induces a gradient nanostructured subsurface through defect-mediated refinement.

Periodic curvature and etching-enhanced surface energy promote dense heterogeneous nucleation.

LIPSS enhances interfacial coherency across monolayer and multilayer coating systems.

The LIPSS-induced polycrystalline architecture deflects cracks and enhances adhesion and wear resistance.

# **Graphical abstract**


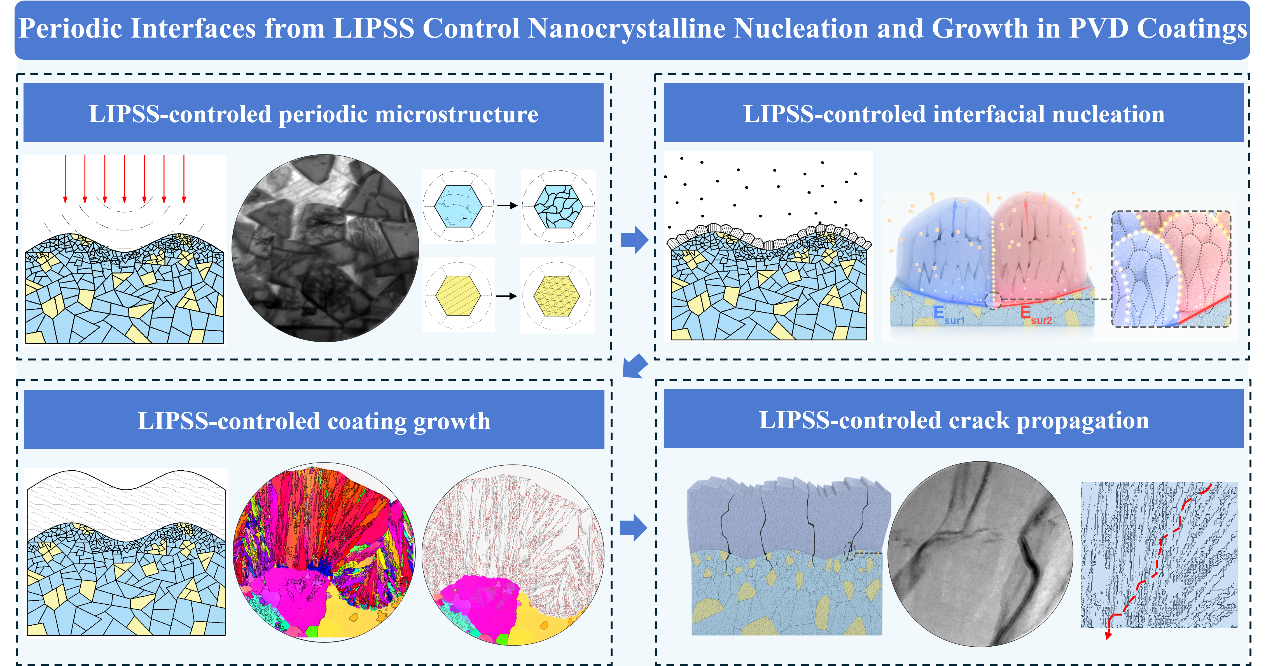

Supplement: Supplementary file 2 [file f0d7a9541aa6054ebe68581a.docx]
